# Supplementary material for: Modelling the Spread of HIV Immune Escape Mutants in a Vaccinated Population
Source: PubMed Central journal article supplement (PMC3228780; doi:10.1371/journal.pcbi.1002289), 2011-12-01
Supplement: pcbi.1002289.s004.pdf [file pcbi.1002289.s004.pdf]

**Text S1. An illustration of how it is determined whether a host is successfully vaccinated or not. This demonstrates the use of the notation  $F$  to describe the set of host and virus types that are successfully vaccinated.**

Consider a vaccine that contains 5 epitopes ( $n=5$ ) restricted by 5 different HLA types:

|                         |    |     |     |     |    |
|-------------------------|----|-----|-----|-----|----|
| Epitope number          | 1  | 2   | 3   | 4   | 5  |
| HLA class I restriction | A1 | A13 | B51 | B27 | B7 |

An individual with HLA type A1, A2, B27, B8 would be host type  $\mathbf{h}_a = (1, 0, 0, 1, 0)$ .

An individual with HLA type A1, A13, B51, B27 would be host type  $\mathbf{h}_b = (1, 1, 1, 1, 0)$ .

A virus with no escape mutations in any of the 5 epitopes would be virus type  $\mathbf{v}_a = (0, 0, 0, 0, 0)$ .

A virus with escape in the A1 and B27 epitopes would be virus type  $\mathbf{v}_b = (1, 0, 0, 1, 0)$ .

The set  $F$  contains  $(\mathbf{h}_a, \mathbf{v}_a)$ ,  $(\mathbf{h}_b, \mathbf{v}_a)$  and  $(\mathbf{h}_b, \mathbf{v}_b)$  but not  $(\mathbf{h}_a, \mathbf{v}_b)$ .

|                                                                                  |                                                                      |                                                                      |                                                                      |                                                                      |
|----------------------------------------------------------------------------------|----------------------------------------------------------------------|----------------------------------------------------------------------|----------------------------------------------------------------------|----------------------------------------------------------------------|
| Host type<br>Virus type                                                          | $\mathbf{h}_a = (1, 0, 0, 1, 0)$<br>$\mathbf{v}_a = (0, 0, 0, 0, 0)$ | $\mathbf{h}_a = (1, 0, 0, 1, 0)$<br>$\mathbf{v}_b = (1, 0, 0, 1, 0)$ | $\mathbf{h}_b = (1, 1, 1, 1, 0)$<br>$\mathbf{v}_a = (0, 0, 0, 0, 0)$ | $\mathbf{h}_b = (1, 1, 1, 1, 0)$<br>$\mathbf{v}_b = (1, 0, 0, 1, 0)$ |
| Ticks and crosses representing the epitopes that do and don't provide protection | (√, ×, ×, √, ×)                                                      | (×, ×, ×, ×, ×)                                                      | (√, √, √, √, ×)                                                      | (×, √, √, ×, ×)                                                      |
| In $F$ ? Hosts are protected if they have protection from at least one epitope.  | Yes                                                                  | No                                                                   | Yes                                                                  | Yes                                                                  |

Notice that we assume no difference in the survivorship or infectiousness of an  $\mathbf{h}_b$  host whether infected with a  $\mathbf{v}_a$  virus or a  $\mathbf{v}_b$  virus. Provided one non-escaped epitope is restricted, the host is successfully vaccinated.
